# Supplementary material for: Genome-Wide Analysis of CDPK Family in Foxtail Millet and Determination of SiCDPK24 Functions in Drought Stress
Source: PubMed Central journal article supplement (PMC6071576; doi:10.3389/fpls.2018.00651), 2018-07-26
Supplement: Presentation_1.pdf [file Presentation_1.pdf]

**Table S1 RNA-seq data analyses of 29 foxtail millet CDPK genes**

| Gene ID          | Col-Expr<br>-ession | D-treatment<br>-Expression | Col-RPKM | D-treatment<br>-RPKM | log2 Ratio<br>(D-treatment/Col) | Up-Down-Regulation<br>(D-treatment/Col) | P-value  |
|------------------|---------------------|----------------------------|----------|----------------------|---------------------------------|-----------------------------------------|----------|
| Si016899m        | 6                   | 29                         | 0.64662  | 3.0055               | 2.21661                         | Up                                      | 0.00011  |
| Si016803m        | 2                   | 8                          | 0.02535  | 0.0975               | 1.94359                         | Up                                      | 0.03354  |
| Si016805m        | 14                  | 46                         | 1.0484   | 3.31263              | 1.65979                         | Up                                      | 5.20E-05 |
| Si029343m        | 17                  | 143                        | 1.83649  | 14.8557              | 3.016                           | Up                                      | 3.48E-25 |
| Si029530m        | 11                  | 41                         | 0.56638  | 2.0301               | 1.84171                         | Up                                      | 4.13E-05 |
| Si029399m        | 104                 | 88                         | 2.45233  | 1.99548              | -0.2974                         | Down                                    | 0.01545  |
| Si029460m        | 1465                | 4519                       | 28.2707  | 83.8609              | 1.56869                         | Up                                      | 0.01356  |
| Si029431m        | 63                  | 190                        | 4.49419  | 13.0342              | 1.53616                         | Up                                      | 4.35E-15 |
| Si021615m        | 69                  | 295                        | 2.20507  | 9.06594              | 2.03963                         | Up                                      | 1.05E-32 |
| Si021672m        | 2                   | 0                          | 0.0568   | 0.001                | -5.8278                         | Down                                    | 0.02356  |
| Si024765m        | 146                 | 341                        | 4.03474  | 9.06223              | 1.16739                         | Up                                      | 1.53E-17 |
| Si021667m        | 3                   | 14                         | 0.1244   | 0.55826              | 2.16598                         | Up                                      | 0.00957  |
| Si025125m        | 77                  | 176                        | 1.87036  | 4.11118              | 1.13623                         | Up                                      | 2.16E-09 |
| Si001025m        | 1345                | 1275                       | 28.2356  | 25.7397              | -0.1335                         | Down                                    | 0.01786  |
| Si003781m        | 2692                | 2071                       | 85.0069  | 62.8893              | -0.4348                         | Down                                    | 3.86E-25 |
| Si000940m        | 466                 | 1129                       | 29.7633  | 69.3438              | 1.22023                         | Up                                      | 3.47E-58 |
| Si015574m        | 80                  | 213                        | 2.56204  | 6.55984              | 1.35637                         | Up                                      | 3.78E-14 |
| Si009791m        | 69                  | 14                         | 2.65623  | 0.51828              | -2.3576                         | Down                                    | 1.33E-10 |
| Si009748m        | 6                   | 0                          | 0.19506  | 0.001                | -7.6078                         | Down                                    | 0.01361  |
| Si009864m        | 62                  | 47                         | 1.56581  | 1.14147              | -0.456                          | Down                                    | 0.01017  |
| Seita.8G051100.1 | 229                 | 33                         | 6.59484  | 0.9139               | -2.8512                         | Down                                    | 3.23E-39 |
| Si026386m        | 153                 | 28                         | 7.1152   | 1.25219              | -2.5064                         | Down                                    | 2.28E-23 |
| Si026320m        | 204                 | 176                        | 16.7793  | 13.9211              | -0.2694                         | Down                                    | 0.06929  |
| Si035115m        | 1                   | 9                          | 0.12976  | 1.12304              | 3.11351                         | Up                                      | 0.01399  |
| Si034852m        | 6                   | 39                         | 0.164    | 1.02515              | 2.64403                         | Up                                      | 6.02E-07 |
| Si034743m        | 99                  | 513                        | 2.00288  | 9.98059              | 2.31705                         | Up                                      | 4.90E-65 |
| Si034847m        | 1375                | 987                        | 21.9242  | 15.1341              | -0.5347                         | Down                                    | 3.61E-19 |
| Si035094m        | 9                   | 42                         | 0.99365  | 4.45922              | 2.16598                         | Up                                      | 3.96E-06 |
| Si040704m        | 298                 | 107                        | 4.60838  | 1.59123              | -1.5341                         | Down                                    | 8.79E-24 |

**Table S2 The characteristics of millet CDPK family members**

| Genename | GeneID    | Gene locus                   | N-Myr | N-Pal | No.of EFs | pI   | No. of aa | M.W (KDa) |
|----------|-----------|------------------------------|-------|-------|-----------|------|-----------|-----------|
| SiCDPK1  | Si016899m | Scaffold 1:8840816..8847147  | Y     | Y     | 4         | 8.89 | 552       | 58.9      |
| SiCDPK2  | Si016803m | scaffold1:4830834..34835537  | Y     | Y     | 4         | 5.59 | 484       | 61.4      |
| SiCDPK3  | Si016805m | scaffold1:42005655..42007553 | N     | Y     | 4         | 5.37 | 558       | 61.1      |
| SiCDPK4  | Si029343m | scaffold2:3226078..3230187   | N     | Y     | 4         | 5.54 | 573       | 63.1      |
| SiCDPK5  | Si029530m | scaffold2:10839583..10847218 | N     | Y     | 4         | 7.65 | 512       | 57.6      |
| SiCDPK6  | Si029399m | scaffold2:37157233..37160378 | Y     | Y     | 4         | 7.86 | 553       | 62.0      |
| SiCDPK7  | Si029460m | scaffold2:41740491..41745028 | Y     | Y     | 4         | 5.94 | 531       | 59.5      |
| SiCDPK8  | Si029431m | scaffold2:43623996..43627879 | N     | Y     | 4         | 6.38 | 541       | 60.9      |
| SiCDPK9  | Si021615m | scaffold3:6126161..6129363   | N     | Y     | 4         | 5.99 | 568       | 63.1      |
| SiCDPK10 | Si021672m | scaffold3:8775983..8779648   | Y     | Y     | 4         | 6.53 | 546       | 61.5      |
| SiCDPK11 | Si024765m | scaffold3:14854877..14857330 | N     | Y     | 4         | 5.6  | 529       | 58.2      |
| SiCDPK12 | Si021667m | scaffold3:17043761..17048442 | NN    | Y     | 4         | 6.07 | 457       | 51.8      |
| SiCDPK13 | Si025125m | scaffold3:46584235..46586884 | N     | Y     | 4         | 5.7  | 618       | 68.3      |
| SiCDPK14 | Si001025m | scaffold5:29354804..29359304 | Y     | Y     | 4         | 6.04 | 522       | 59.0      |
| SiCDPK15 | Si003781m | scaffold5:39548186..39550182 | NN    | Y     | 4         | 5.25 | 377       | 42.5      |
| SiCDPK16 | Si000940m | scaffold5:40607910..40614617 | Y     | Y     | 4         | 6.0  | 541       | 60.5      |
| SiCDPK17 | Si015574m | scaffold6:34338578..34340381 | Y     | Y     | 4         | 6.82 | 556       | 60.9      |
| SiCDPK18 | Si009791m | scaffold7:27056236..27059947 | Y     | Y     | 4         | 6.09 | 534       | 60.1      |
| SiCDPK19 | Si009748m | scaffold7:28338539..28343706 | Y     | Y     | 4         | 5.6  | 556       | 61.2      |

|          |                  |                              |    |   |   |      |     |      |
|----------|------------------|------------------------------|----|---|---|------|-----|------|
| SiCDPK20 | Si009864m        | scaffold7:33248290..33253115 | NN | Y | 4 | 5.41 | 515 | 56.8 |
| SiCDPK21 | Seita.8G051100.1 | scaffold8:4338220..4345155   | NN | Y | 4 | 5.91 | 843 | 94.9 |
| SiCDPK22 | Si026386m        | scaffold8: 4338508-4341101   | NN | Y | 4 | 5.15 | 435 | 48.8 |
| SiCDPK23 | Si026320m        | scaffold8:4404915..4408135   | NN | Y | 3 | 5.87 | 473 | 52.6 |
| SiCDPK24 | Si035115m        | scaffold9:2438664..2442949   | N  | Y | 4 | 6.89 | 531 | 59.8 |
| SiCDPK25 | Si034852m        | scaffold9:3605681..3609558   | N  | Y | 4 | 5.39 | 582 | 63.9 |
| SiCDPK26 | Si034743m        | scaffold9:3622757..3626164   | N  | Y | 4 | 5.9  | 614 | 67.1 |
| SiCDPK27 | Si034847m        | scaffold9:8599081..8603512   | N  | Y | 4 | 9.01 | 583 | 64.5 |
| SiCDPK28 | Si035094m        | scaffold9:40133380..40138172 | N  | Y | 2 | 4.97 | 535 | 60.5 |
| SiCDPK29 | Si040704m        | scaffold9:57206117..57210503 | N  | Y | 4 | 5.27 | 527 | 59.6 |

**Table S3 The cis-acting element analysis of millet CDPK family member promoters**

| Gene name        | Motifs related to stress response                                                                                     | Motifs related to growth and development                             |
|------------------|-----------------------------------------------------------------------------------------------------------------------|----------------------------------------------------------------------|
| Si016803m        | Box-W1, TCA-element, GC-motif, MBS, MYB, MYC, DRE                                                                     | Skn-1_motif,                                                         |
| Si016805m        | ABRE, ACE, ARE, GARE-motif, LTR, TATC-box, TC-rich repeats, TCA-element, TGA-element, MYB, MYC, DRE                   | GCN4_motif,CAT-box,MBS,Skn-1_motif,as-2-box                          |
| Si029343m        | ABRE, ACE, Box-W1, CGTCA-motif, ERE, GC-motif, HSE, MBS, TC-rich repeats, TGACG-motif, MYB, MYC                       | MBSI,Skn-1_motif,as-2-box ,circadian                                 |
| Si025125m        | ACE, GARE-motif, GC-motif, HSE, LTR, TC-rich repeat, TCA-element, MYB, MYC, DRE                                       | CAT-box, GCN4_motif, MBS, O2-site, Skn-1_motif.                      |
| Si009748m        | GC-motif, LTR, TC-rich repeats, TGA-element, MYB, MYC, DRE                                                            | CCGTCC-box,as-2-box                                                  |
| Si009864m        | ABRE, C-repeat/DRE, CGTCA-motif, GARE-motif, GC-motif, HSE, TC-rich repeats, TCA-element, TGACG-motif, MYB, MYC, DRE  | CCGTCC-box, circadian                                                |
| Seita.8G051100.1 | ABRE, ACE, ARE, Box-W1, CGTCA-motif, CGTCA-motif, LTR, MBS, TC-rich repeats, TCA-element , TGACG-motif, MYB, MYC      | O2-site,Skn-1_motif,circadian                                        |
| Si026386m        | ACE, ARE, CGTCA-motif, LTR, MBS, TC-rich repeats, TCA-element, TGA-element, TGACG-motif, MYB, MYC, DRE                | GCN4_motif,CCGTCC-box,HD-Zip1,HD-Zip2, O2-site,Skn-1_motif,circadian |
| Si026320m        | ACE, Box-W1, CGTCA-motif, ERE, GARE-motif, GC-motif, LTR, MBS, P-box, TGACG-motif, MYB, MYC, DRE                      | AuxRR-core,Skn-1_motif,circadian                                     |
| Si034852m        | ABRE, ARE, Box-W1, CGTCA-motif, HSE, MBS, TGA-element, TGACG-motif, MYB, MYC, DRE                                     | CAT-box,CCGTCC-box,O2-site,Skn-1_motif                               |
| Si034743m        | ABRE, ARE, Box-W1, CGTCA-motif, GC-motif, HSE, MBS, P-box, TCA-element, TGACG-motif, motif Iib, MYB, MYC, DRE         | GCN4_motif,HD-Zip 1,HD-Zip 2                                         |
| Si035094m        | ABRE, Box-W1, ERE, GARE-motif, GC-motif, HSE, MBS, TCA-element, MYB, MYC, DRE                                         | GCN4_motif,Skn-1_motif                                               |
| Si040704m        | ABRE, ARE, GARE-motif, GC-motif, HSE, LTR, MBS, motif Iib TC-rich repeats, TCA-element, MYB, MYC, DRE                 | CCGTCC-box,GCN4_motif                                                |
| Si029460m        | ARE, Box-W1, CGTCA-motif, ERE, GARE-motif, HSE, MBS, TC-rich repeats, TCA-element, TGA-element, TGACG-motif, MYB, MYC | O2-site ,Skn-1_motif,circadian                                       |
| Si021672m        | ABRE, ACE, ARE, Box-W1, CGTCA-motif, GARE-motif, motif Iib, GC-motif, P-box, TCA-element, TGACG-motif, MYB, MYC, DRE  | CAT-box,CCGTCC-box,GCN4_motif,O2-site, Skn-1_motif,                  |
| Si024765m        | ABRE, ACE, CGTCA-motif, GARE-motif, GC-motif, MBS, TGACG-motif, TC-rich repeats, MYB, MYC, DRE                        | CAT-box ,CCGTCC-box,Skn-1_motif,as1,                                 |
| Si001025m        | ABRE, ARE, CGTCA-motif, GARE-motif, GC-motif, HSE, motif Iib, TCA-element, TGACG-motif, MYB, MYC, DRE                 | CCGTCC-box,O2-site,circadian,dOCT,                                   |
| Si003781m        | ABRE, ACE, ARE, Box-W1, CGTCA-motif, GARE-motif, motif Iib, GC-motif,, MBS, TGACG-motif, MYB, MYC, DRE                | CCGTCC-box,O2-site,OCT,RY-element,Skn-1_motif, circadian,            |
| Si009791m        | ABRE, ARE, CGTCA-motif, GARE-motif, GC-motif, HSE, MBS, P-box, TCA-element, TGACG-motif, motif Iib, MYB, MYC, DRE     | CAT-box,CCGTCC-box,O2-site,Skn-1_motif                               |
| Si029399m        | ARE, CGTCA-motif, GARE-motif, GARE-motif, MBS, P-box, TCA-element, TGACG-motif, MYB, MYC, DRE                         | O2-site,circadian                                                    |
| Si029431m        | ABRE, ARE,CGTCA-motif, GARE-motif, GC-motif, HSE, LTR, P-box, TCA-element, TGACG-motif, MYB, MYC, DRE                 | CAT-box,CCGTCC-box,O2-site,circadian                                 |
| Si021615m        | ABRE, Box-W1, GARE-motif, GC-motif, HSE, MBS, MYB, MYC, DRE                                                           | CCGTCC-box,Skn-1_motif                                               |
| Si021667m        | ACE, ARE, CGTCA-motif, ERE, GC-motif, MBS, P-box, motif Iib, TC-rich repeats, TCA-element, MYB, MYC, DRE              | CAT-box, CCGTCC-box, MBSI                                            |

|           |                                                                                                                    |                                          |
|-----------|--------------------------------------------------------------------------------------------------------------------|------------------------------------------|
| Si000940m | ABRE, CGTCA-motif, GARE-motif, GC-motif, HSE, P-box, TGACG-motif, MYB, MYC, DRE                                    | CCGTCC-box,GCN4_motif,O2-site,circadian  |
| Si015574m | ABRE, CGTCA-motif, GC-motif, MBS, TGACG-motif, motif IIb, MYB, MYC                                                 | CAT-box,CCGTCC-box,Skn-1_motif,circadian |
| Si035115m | ABRE, ACE, ARE, CGTCA-motif, GARE-motif, GARE-motif, LTR, MBS, TC-rich repeats, TCA-element, TGACG-motif, HSE, DRE | GCN4_motif,O2-site,Skn-1_motif           |
| Si034847m | CGTCA-motif, GC-motif, MBS, TGACG-motif, MYB, MYC, DRE                                                             | CCGTCC-box,GCN4_motif,Skn-1_motif        |
| Si016899m | LTR , TCA-element , Box-W1, TCA-element, MYB, MYC                                                                  | Skn-1_motif,GC-motif,O2-site,as-2-box    |
| Si029530m | ABRE, ARE, Box-W1, CGTCA-motif, GC-motif, MBS, TC-rich repeats, TGACG-motif, MYB, MYC                              | Skn-1_motif,as-2-box                     |

**Table S4 The RT-PCR primers of millet CDPK family members**

| Gene                    | Forward primer                  | Reverse primer                      |
|-------------------------|---------------------------------|-------------------------------------|
| SiCDPK24-zero           | GAGTTCTTCCCTTTCAGTCAGTC         | TAACCTGATGACCAAAGAGTAAAAG           |
| SiCDPK24-1302           | GGGACTCTTGACCATGATGGGCAACTGCTGC | TCAGATCTA CCCATGGCCGTGTCTCAGCGCCGAT |
| SiCDPK24-GFP            | TATCTCTAGAGGATCCATGGGCAACTGCTGC | TGCTCACCATGGATCCCCGTGTCTCAGCGCCGAT  |
| SiCDPK24-Pcold          | TACCCTCGAGGGATCCATGGGCAACTGCTGC | GCTTGAATTCGGATCCCCGTGTCTCAGCGCCGAT  |
| SiCDPK1-RT              | GAAAGATGCTGCGGTGGTAGT           | GAGCAAAATGTAGGTTA                   |
| SiCDPK2-RT              | CCTGATCGGCCTCTTGATCC            | TGTTGTCTATATCCGCCGCC                |
| SiCDPK3-RT              | CTTACGCCCACCTACACAT             | GAGCTCCGTGCACAGGTAG                 |
| SiCDPK4-RT              | CTTCAACTCCGTCTCCCTC             | ACTGATAGGTGGTGCCGAACT               |
| SiCDPK5-RT              | GTCCGACAGATGCTCAAGGT            | ATTCTGGCCCTGACTTACGC                |
| SiCDPK6-RT              | AGCTCTTCGACCGCATCTTC            | AGTCCTCCGACTTGTTACAG                |
| SiCDPK7-RT              | AGGCAAAGCCAGCACATACA            | TGCGGATGTCTCCCTATCT                 |
| SiCDPK8-RT              | TTTGACCGGAACGAGAGTGG            | CAGTCCGTTCCAGCCTTCAT                |
| SiCDPK9-RT              | TGGACACCAACAAGGATGGG            | GCAGGTGATCCTCACTACGG                |
| SiCDPK10-RT             | CACTCGGTCAACCTCGTCAT            | ACCGGGCTTGAAGAATACGG                |
| SiCDPK11-RT             | ATCTGGAGCGTGGCGT                | GAGGACGTCGTGTGCAGAAA                |
| SiCDPK12-RT             | TTTGGCTGTCTCGCTTCACT            | TGACCACGTCCATGCTATCG                |
| SiCDPK13-RT             | AGACCGAGAACCTCAAGGACAA          | TCCATCACCACGTGTACCG                 |
| SiCDPK14-RT             | GCCAGTTCGGAGTCACCTAC            | ATGACGAGGTTGACCGAGTG                |
| SiCDPK15-RT             | GGAGGTGCTCAAGAGGAACTAT          | CAAGGATGATTGAGGACGTCCG              |
| SiCDPK16-RT             | CACCTCGTCATGGAGCTCTG            | CGGCGAGTCTCCTTCTTGT                 |
| SiCDPK17-RT             | GACAAGGACCACAACGGGAA            | TGTCGAAGTACCTGAACGCC                |
| SiCDPK18-RT             | GAGACCTCAAGCCCCGAGAAC           | TAATCCGGCGCAGTACCTC                 |
| SiCDPK19-RT             | TCTCGTGGCAGCCTTTTCAT            | CGCATTGTTCTTCGACCGAC                |
| SiCDPK20-RT             | CACTACCGCATCGGGAAGAA            | CTCCATGACGAGATGCACGA                |
| SiCDPK21-RT             | ACGCAACAGGGAGTGATGAG            | CGTAATGGAGCTTGTTGCCG                |
| SiCDPK22-RT             | ATGGTTCTGTGGCACCTGAT            | CAGCCGCATCCATTAACGTC                |
| SiCDPK23-RT             | TCGTTGCCAAGGGTCACTAC            | GCGACATAGTAGGGGCTTCC                |
| SiCDPK24-RT             | TGATTTTGGGCTGTCCGTGT            | ATTGCCTGTGCTACTCCCTG                |
| SiCDPK25-RT             | TATGGCCGCGAAGTTGATGT            | GAGGCTTGTGAGGAGCAACT                |
| SiCDPK26-RT             | TGGCTCCTGATAAGCCGTTG            | ATCAGGGCGTAGATCTCGGA                |
| SiCDPK27-RT             | AAGCCCCGAGAACTTCTGTGA           | GCATCGCCTTCTTCTCAGC                 |
| SiCDPK28-RT             | AAATGCTCTGCCCTTGCCA             | CGGTGTTCGATTGCCTTGAAC               |
| SiCDPK29-RT             | TGAAAGGAAGACAGCCGACC            | CCTGCCCCGTCTCATAAACA                |
| <i>Actin</i> (Si001873) | GGCAAACAGGGAGAAGATGA            | GAGGTTGTCCGTAAGGTCACG               |

**Table S5 The RT-PCR primers of stress responsive genes**

| Gene                     | Forward primer          | Reverse primer        |
|--------------------------|-------------------------|-----------------------|
| <i>AtRD29B</i>           | AGACAGAGGAGAGAGCAGAG    | CGTTGACCACCGAGATAG    |
| <i>AtCOR15A</i>          | GCGATGTCTTTCTCAGGAGC    | CGAACTGAGTTTTCTGGCCG  |
| <i>AtCOR47</i>           | AGGATTCACCAGCTGTCACG    | CCTCTTCAGTGGTCTTGGCA  |
| <i>AtRD29A</i>           | TATTCGCCGGAATCTGACGG    | GATGCCTCACCGTATCCAGG  |
| <i>AtKIN1</i>            | CTGGAGCTGGAGCACAACAG    | TTGTTTCAGGCCGGTCTTGTC |
| <i>AtLEA14</i>           | CTCACCGGATCCCTAAACC     | GGGTCCGGTATCTTCCCCTT  |
| <i>AtRD22</i>            | AGGAGCAAACCTTTTCGTGT    | CGCAGTTTTGCCTCCGTAAC  |
| <i>AtDREB2A</i>          | GGTTGGCCCAATGATGTGGA    | CCATCCTTCCCTCGAGCTG   |
| <i>AtDREB1A</i>          | AGAACCAAACAAGAAAACAAGGA | AAGCCGAGTCAGCGAAATT   |
| <i>Actin (At3g18780)</i> | GGCAAGTCATCACGATTGG     | CAGCTTCCATTCCCACAAAC  |

**Figure S1**

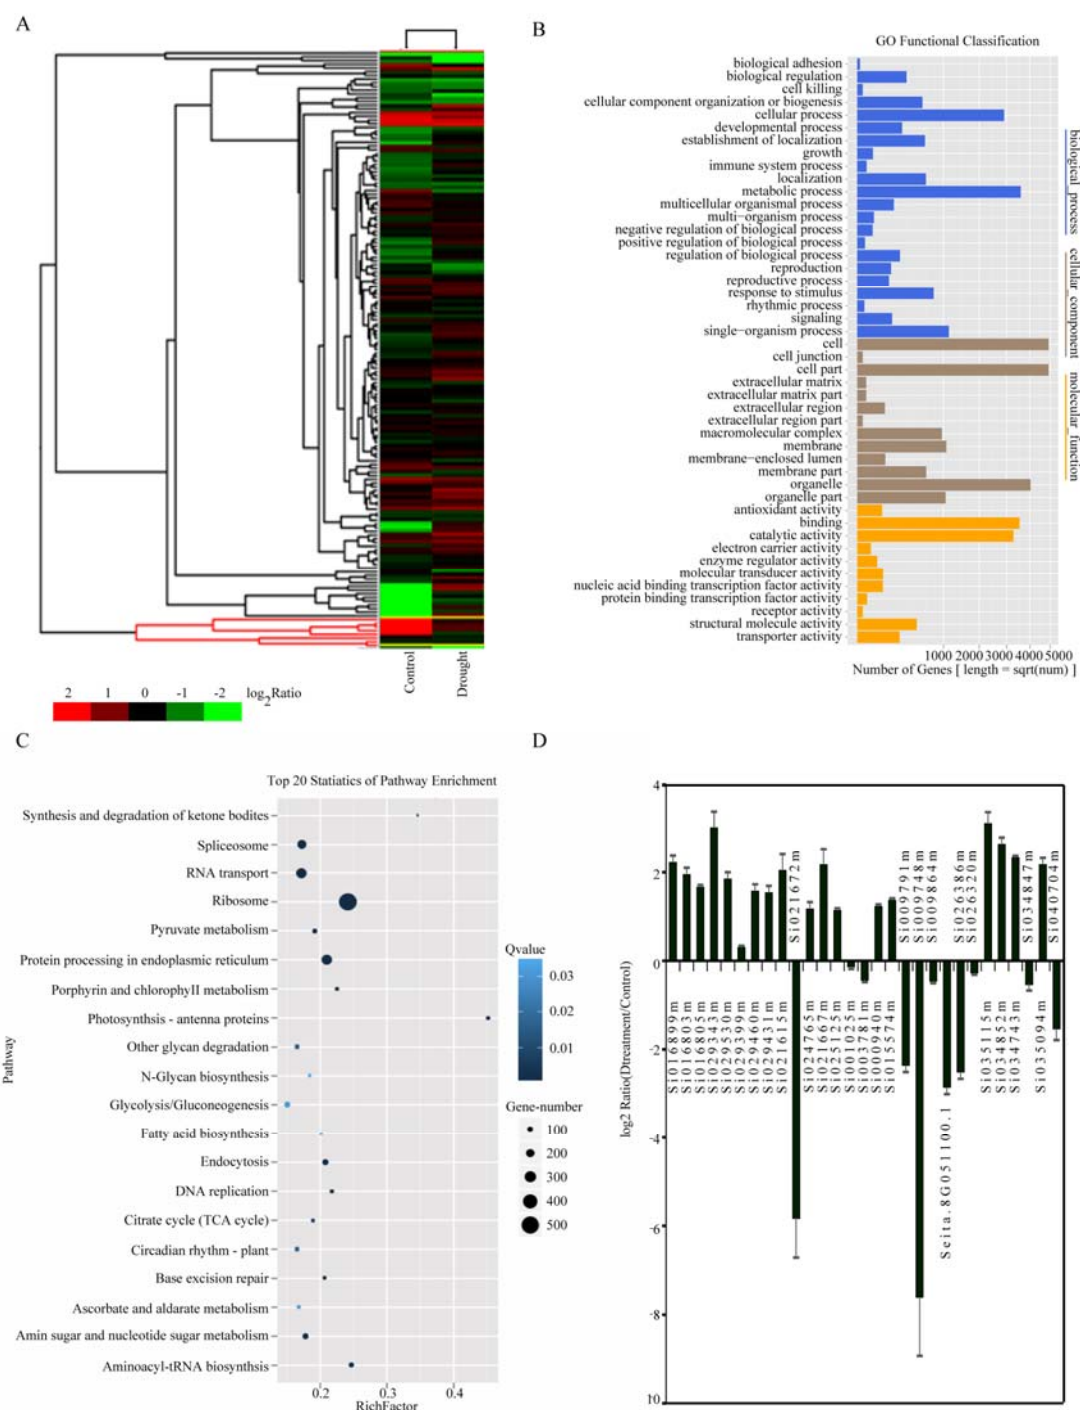

**Figure S1 De novo transcriptome sequencing analysis.** (A) The differential expression of genes before or after drought treatment. (B) The most enriched GO terms of up-regulated genes. (C) The pathway enrichment statistics of up-regulated genes. (D) The expression patterns of all SiCDPK genes after drought treatment in transcriptome sequencing analysis. Vertical bars in (D) indicate  $\pm$ SE of three replicates

**Figure S2**

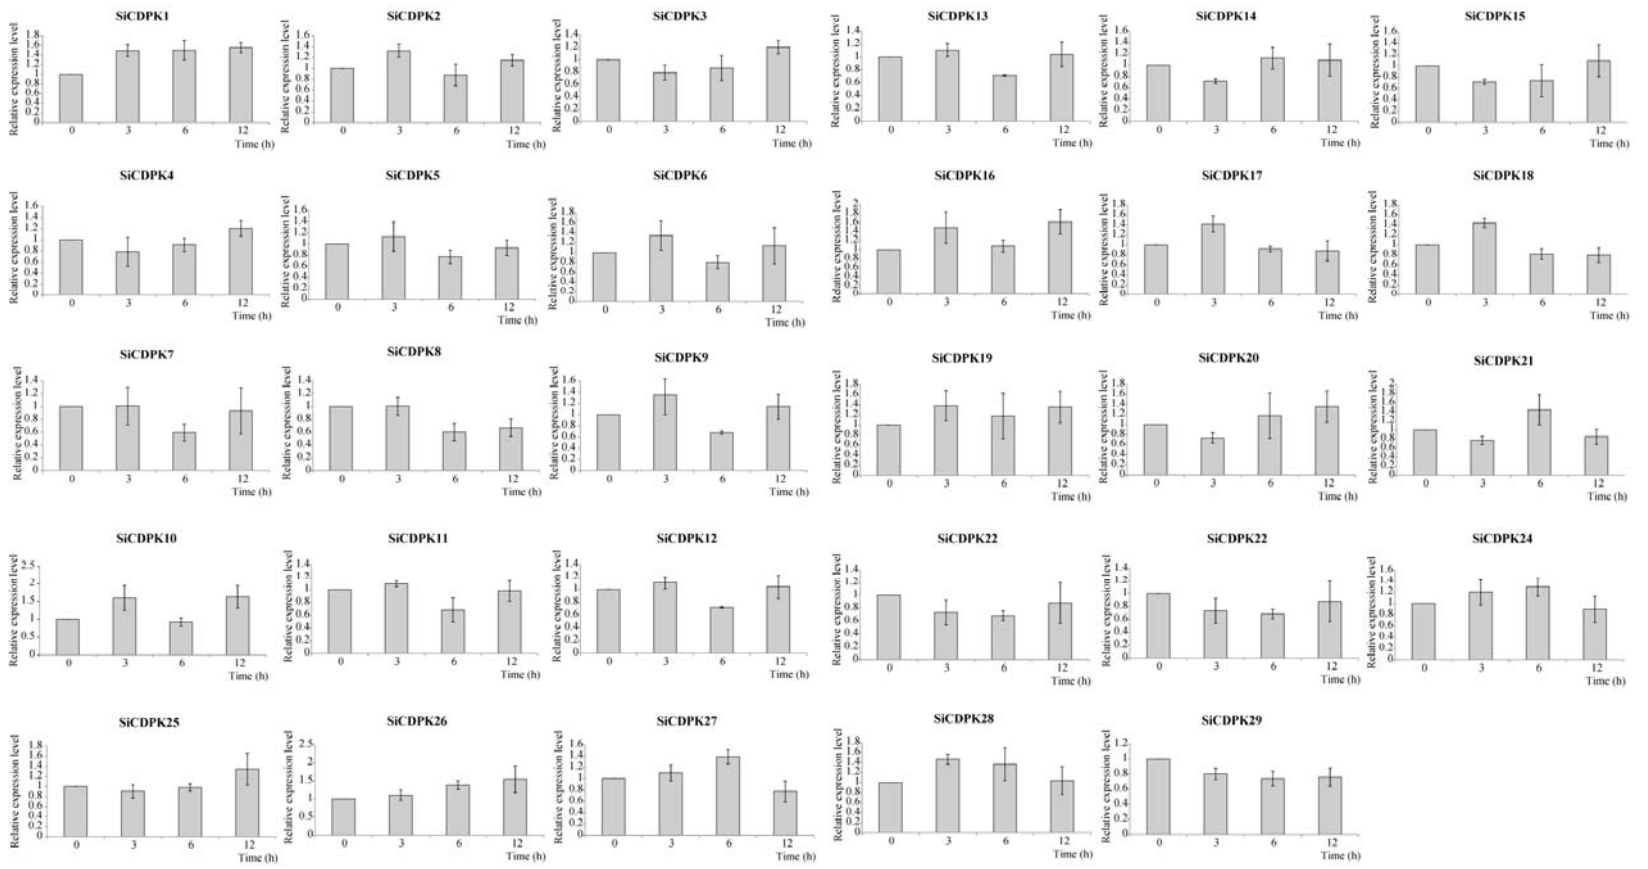

**Figure S2 The expression levels of 29 foxtail millet CDPKs at different time period of H<sub>2</sub>O treatment.**
